# Supplementary material
Source: Copernicus journal article supplement (doi:10.5194/hess-30-3313-2026)
Supplement: Supplementary file 1 [file hess-30-3313-2026-supplement.pdf]

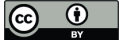

*Supplement of*

## **Isotopic insights into the dynamics of soil water pools along an elevation gradient**

**Jiri Kocum et al.**

*Correspondence to:* Jiri Kocum (kocum@ih.cas.cz)

The copyright of individual parts of the supplement might differ from the article licence.

**S1. Results of the seasonal comparison of the stable isotopic composition from the two remaining sites, TD and RO.**

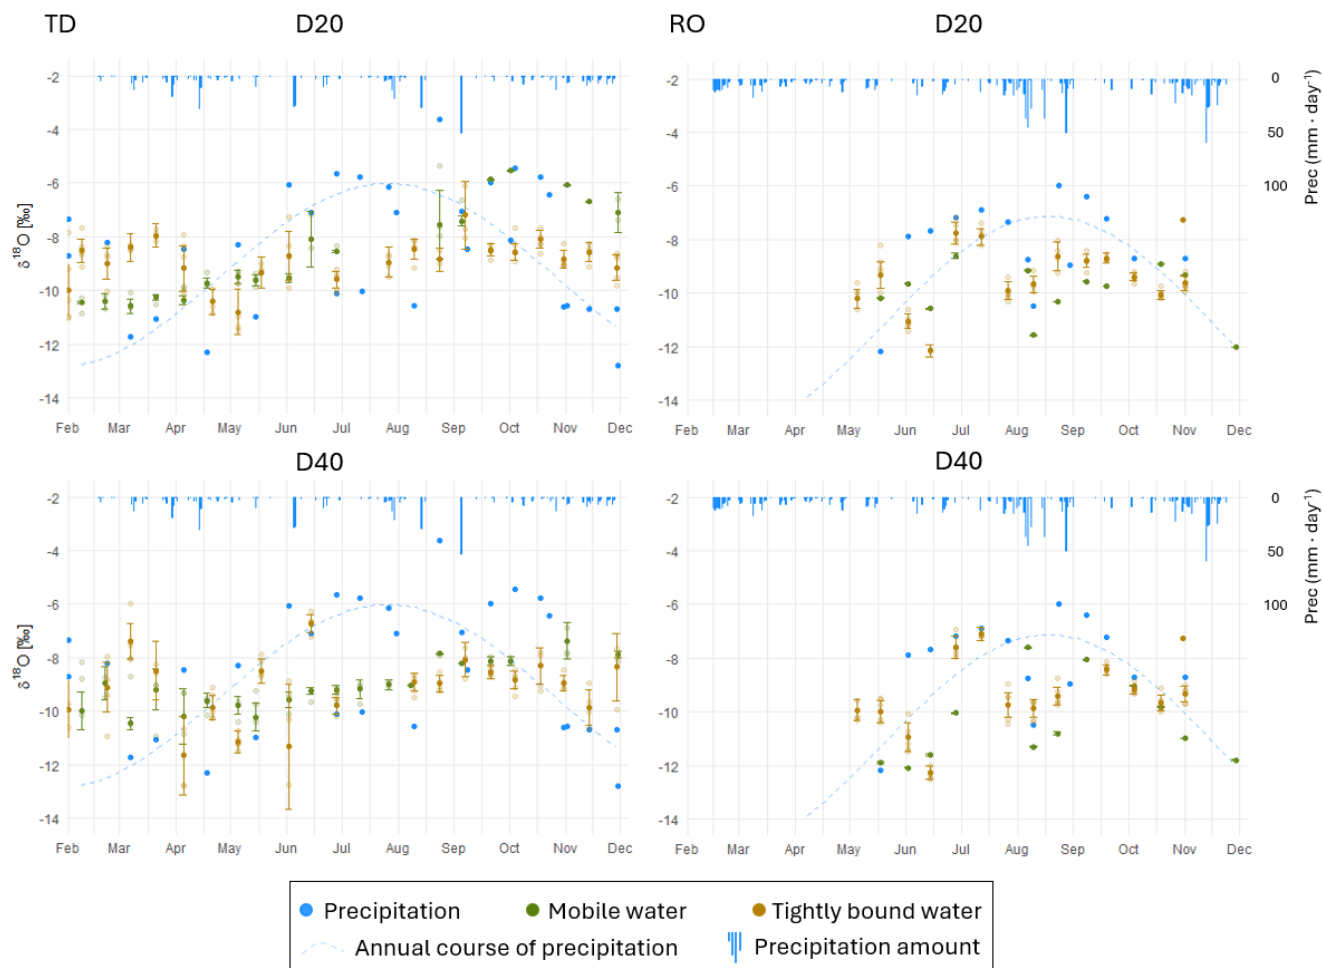

**Figure S1.** Seasonal comparison of the stable isotopic compositions of mobile and tightly bound soil water at two depths (D20 = 20 cm; D40 = 40 cm) at selected study sites. Left panels: TD (mid-elevation meadow); right panels: RO (montane beech forest at the highest-elevation site). Blue rectangles denote the daily precipitation (mm), and the light-blue dashed sine curve represents the weighted fit of the annual cycle of precipitation isotopic composition.

## S2. Mass-balance mixing method and error propagation

### Principle

Soil samples (20–30g) were transferred into 40 mL glass vials (ND24 (EPA), VERKON s. r. o., Czech Republic) equipped with plastic screw caps fitted with silicone/PTFE septa (VERKON s. r. o., Czech Republic). Subsequently, 20–25 mL of isotopically labelled water (distilled tap water) was added to each sample, and the remaining headspace was filled with 5 mm diameter glass beads to eliminate residual air and to enhance mechanical disaggregation of soil aggregates, thereby promoting efficient mixing (Fig. 2). The vials were then mounted on a laboratory-constructed rotating device (Fig. S2) and continuously rotated for 16 h at a constant speed of 15 rpm. Following mixing, the samples were refrigerated and left to settle to allow sedimentation. Thereafter, a 0.75 mL sample of the clear liquid phase was collected and filtered through a 0.45  $\mu\text{m}$  mixed cellulose ester syringe filter. The remaining sample was transferred into pre-weighed aluminium weighing dishes and oven-dried at 105  $^{\circ}\text{C}$  for 48 h, after which it was weighed to determine the soil water content of the soil sample.

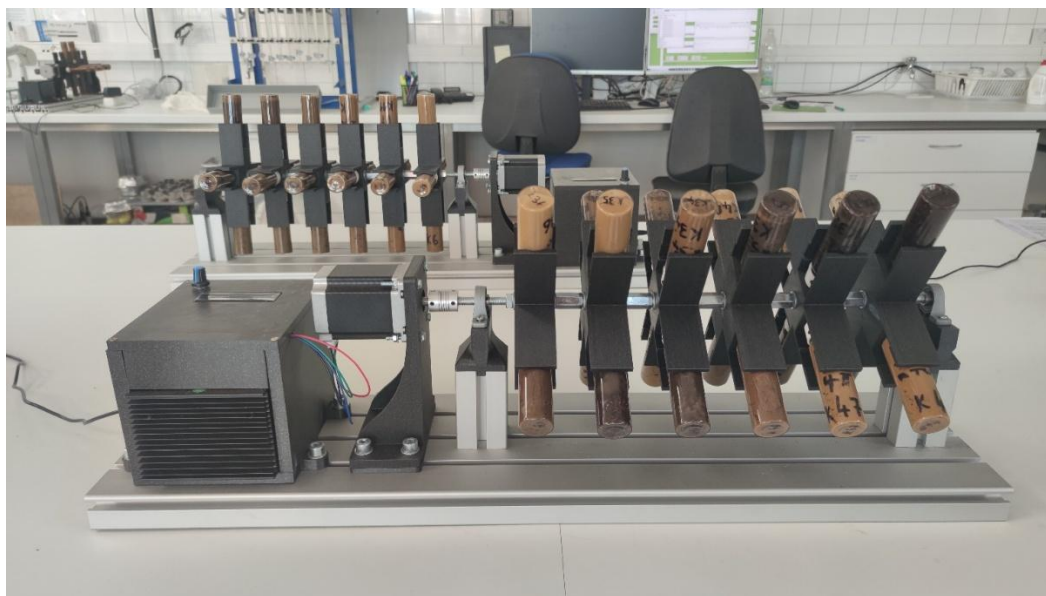

**Figure S2.** Custom-built laboratory apparatus designed to ensure homogeneous mixing of soil and added water through controlled mechanical motion of sealed sample vials prior to analysis.

In both field measurements and spiking experiments, laboratory-distilled water was used as the labelled end-member. Its isotopic composition lies near the centre of the annual range of soil water  $\delta^{18}\text{O}$  values, with native soil water typically varying by up to  $\pm 5\%$  around this value. This minimizes the isotopic contrast between the mixed components. The use of isotopically more distinct labelled water would increase the sensitivity of the mixing equation to weighing errors, leading to larger uncertainties in the estimated soil water isotopic composition, particularly at low soil moisture (Fig. S3).

Accordingly, the isotopic contrast between the labelled and native soil water is explicitly incorporated into the error propagation scheme for each sample, as the associated uncertainty increases with increasing end-member separation. Consequently, higher uncertainty is expected for soil water originating from winter or summer conditions compared to spring or autumn periods.

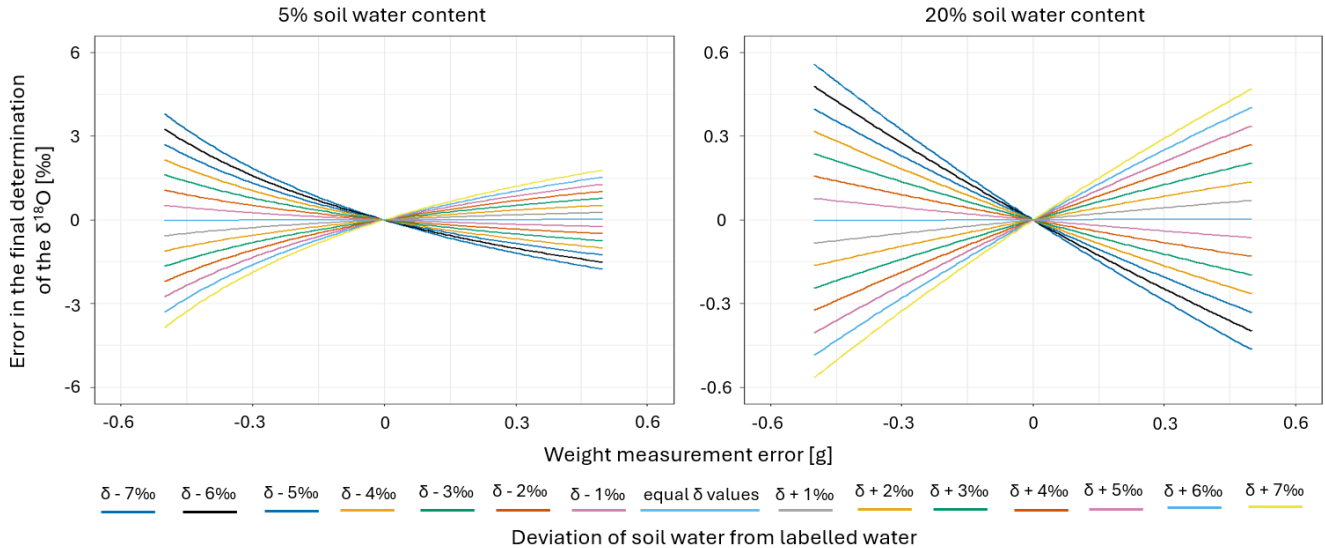

**Figure S3.** Sensitivity of the mixing method to weighing errors under different water contents and varying isotopic differences between the mixed components. Y-axes differ in scale.

40

**Table S1.** Measured variables and their measurement error

| Variables | Variable description                                               | Measurement error |
|-----------|--------------------------------------------------------------------|-------------------|
| $m_1$     | Weight of empty vial                                               |                   |
| $m_2$     | Weight of empty vial + soil                                        |                   |
| $m_3$     | Weight of empty vial + soil + labelled water                       | $\pm 0.01$ g      |
| $m_4$     | Weight of empty vial + soil + labelled water + glass beads         |                   |
| $m_5$     | Weight of empty aluminium weighing dish                            |                   |
| $m_6$     | Weight of the oven-dried aluminium weighing dishes with dry sample | $\pm 0.03$ g*     |

\* An increased weighing uncertainty was considered to account for unstable balance readings caused by weighing the hot sample immediately after removal from the oven.

45

**Table S2.** Key relationships for mixing method calculation

Weight of labelled water

$$m_L = m_3 - m_2$$

$$m_{TBW} = (m_2 - m_1) - (m_6 - m_5 - (m_4 - m_3))$$

Weight of tightly bound soil water

$$m_{TBW} = m_2 - m_1 - m_6 + m_5 + m_4 - m_3$$

Weight of the mixture

$$m_M = m_L + m_{TBW}$$

Mixing model equation

$$\delta_{TBW} = \frac{m_M \delta_M - m_L \delta_L}{m_{TBW}}$$

---

**Estimation of error propagation**

GUM uncertainty calculation

$$\sigma_{\delta_{TBW}} = \frac{1}{|m_{TBW}|} \sqrt{[3(0.01)^2 + (0.03)^2](\delta_M - \delta_{TBW})^2 + 2(0.01)^2(\delta_{TBW} - \delta_L)^2 + m_M^2 \sigma_{\delta_M}^2 + m_L^2 \sigma_{\delta_L}^2}$$


---

50 **Final error estimation**

Observed SD

$$\sigma_{obs} = \sqrt{\frac{1}{n-1} \sum_{i=1}^n (x_i - \bar{x})^2}$$

Predicted SD

$$\sigma_{pred} = \text{GUM uncertainty calculation}$$

$$\text{if } \sigma_{obs}^2 > \sigma_{pred}^2 \text{ then } \sigma_{final} = \sqrt{\sigma_{obs}^2 + \sigma_{pred}^2}$$

Final error estimation

$$\text{if } \sigma_{obs}^2 < \sigma_{pred}^2 \text{ then } \sigma_{final} = \sigma_{pred}$$

$$\hat{X} = \frac{\sum_{i=1}^n \omega_i x_i}{\sum_{i=1}^n \omega_i} \quad \text{and} \quad \omega_i = \frac{1}{\sigma_{i_{final}}}$$

Inverse-Variance  
Weighted Mean

$$\sigma_{\hat{X}} = \sqrt{\frac{1}{\sum_{i=1}^n \omega_i}}$$

$$\chi^2 = \sum_{i=1}^n \omega_i (X_i - \hat{X})^2$$

Standard Error of  $\hat{X}$ 

$$v = n - 1 \quad \chi_{red}^2 = \frac{\chi^2}{v}$$

$$SE = \begin{cases} \sigma_{\hat{X}} \sqrt{\chi_{red}^2}, & \text{if } \chi_{red}^2 > 1 \\ \sigma_{\hat{X}}, & \text{otherwise} \end{cases}$$

Weighted Standard  
Deviation

$$SD_{\omega} = \sqrt{\frac{\sum_{i=1}^n \omega_i (X_i - \hat{X})^2}{\sum_{i=1}^n \omega_i}}$$

95 % Confidence  
Interval

$$CI_{95} = 1.96 \cdot SE$$

*All soil water samples are then presented in the form of  $X = \hat{X} \pm SE \pm SD$  or  $\hat{X} \pm CI_{95}$ .*

### Spike experiments

- 60 To verify the accuracy of the method, a spike experiment with ~29g of soil, and known amounts and stable isotopic compositions of soil water, and labelled water was conducted. Loamy sand from the Liz site was selected, as it is representative of the soil cover across the study sites included in this study. Oven-dried soil was spiked and stored at 4 °C for 24 h to allow equilibration. Subsequently, different amounts of labelled water were added to simulate a range of mixing ratios. In contrast to the extraction of field samples, all input variables were known; therefore, the oven-drying step was omitted. Accordingly,
- 65 the error propagation scheme was modified to reflect this experimental setup.

**Table S4.** Measured variables and their measurement error within spike experiment

| Variables      | Variable description                                                    | Measurement error |
|----------------|-------------------------------------------------------------------------|-------------------|
| m <sub>1</sub> | Weight of empty vial                                                    |                   |
| m <sub>2</sub> | Weight of empty vial + soil                                             |                   |
| m <sub>3</sub> | Weight of empty vial + soil + soil water                                | ± 0.01 g          |
| m <sub>4</sub> | Weight of empty vial + soil + soil water + labelled water               |                   |
| m <sub>5</sub> | Weight of empty vial + soil + soil water + labelled water + glass beads |                   |

70

**Table S5.** Key relationships for mixing method spike experiment calculation

Weight of labelled water  $m_L = m_4 - m_3$

Weight of tightly bound soil water  $m_{TBW} = m_3 - m_2$

Weight of the mixture  $m_M = m_L + m_{TBW}$

Mixing model equation 
$$\delta_{TBW} = \frac{m_M \delta_M - m_L \delta_L}{m_{TBW}}$$

**Estimation of error propagation**

GUM uncertainty calculation 
$$\sigma_{\delta_{TBW}} = \frac{1}{|m_{TBW}|} \sqrt{2(0.01)^2 [(\delta_{TBW} - \delta_L)^2 + \delta_{TBW}^2] + m_M^2 \sigma_{\delta_M}^2 + m_L^2 \sigma_{\delta_L}^2}$$

75

**Results of spike experiments**

In total, five spike experiments, with 8 repetition each, were performed to simulate various mixing ratios of soil and labelled water, specifically 2.5, 5, 6, 7, and 10. Furthermore, additional spike experiments involving the pressure plate apparatus were performed. For all spike experiments, the isotopic composition of soil and labelled water was as follows: for  $\delta^{18}\text{O}$ ,  $-12.52$  and  $-9.35 \pm 0.03\%$ , and for  $\delta^2\text{H}$ ,  $-90.04$  and  $-64.82 \pm 0.15\%$ , respectively. The results of these experiments are summarized in Table S6.

**Table S6.** Spike experiments result of the mixing method and the use of pressure plate apparatus.

| Mixing ratio | N  | $\delta^{18}\text{O}$ |      |      |           | $\delta^2\text{H}$ |      |      |           |
|--------------|----|-----------------------|------|------|-----------|--------------------|------|------|-----------|
|              |    | Average shift         | SE   | SD   | $CI_{95}$ | Average shift      | SE   | SD   | $CI_{95}$ |
| 2.5          | 8  | 0                     | 0.10 | 0.05 | 0.19      | 0.17               | 0.35 | 0.90 | 0.69      |
| 5            | 8  | 0.09                  | 0.15 | 0.13 | 0.30      | 0.18               | 0.76 | 2.01 | 1.49      |
| 6            | 8  | 0.08                  | 0.16 | 0.13 | 0.32      | -0.04              | 0.79 | 2.10 | 1.56      |
| 7            | 8  | 0.08                  | 0.16 | 0.14 | 0.32      | -0.36              | 0.97 | 2.56 | 1.89      |
| 10           | 8  | 0.12                  | 0.23 | 0.32 | 0.44      | 0.77               | 1.9  | 5.03 | 3.73      |
| 5*           | 2  | -0.30                 | 0.29 | 0.10 | 0.57      | -2.40              | 1.54 | 1.54 | 3.03      |
| 6*           | 10 | -0.40                 | 0.14 | 0.13 | 0.27      | -3.56              | 0.46 | 1.37 | 0.89      |
| 7*           | 9  | -0.30                 | 0.14 | 0.10 | 0.28      | -2.73              | 0.38 | 1.02 | 0.74      |
| 8*           | 3  | -0.43                 | 0.23 | 0.08 | 0.44      | -3.08              | 1.21 | 1.71 | 2.37      |

85 *N*: number of samples used in the test. Average shift: difference between the calculated and the initially known soil water. SE: standard error. SD: weighted standard deviation.  $CI_{95}$ : 95% confidence interval. All  $\delta$  values are reported in ‰. Results marked with \* indicate tests involving the pressure plate apparatus. All study samples processed in the pressure plate apparatus were corrected for the average shift by -0.36 ‰ and -2.94 ‰ for  $\delta^{18}\text{O}$  and  $\delta^2\text{H}$ , respectively. Samples that could not be processed in the overpressure apparatus due to low moisture content (no MW) were corrected using values obtained

90 from tests of the mixing method itself.
